# Supplementary material
Source: Springer Nature journal article supplement (https://www.springermedizin.de/resource/supplementary/13014_2006_64_MOESM4_ESM.pdf/9632832)

# LOCAL CONTROL following definitive IMRT

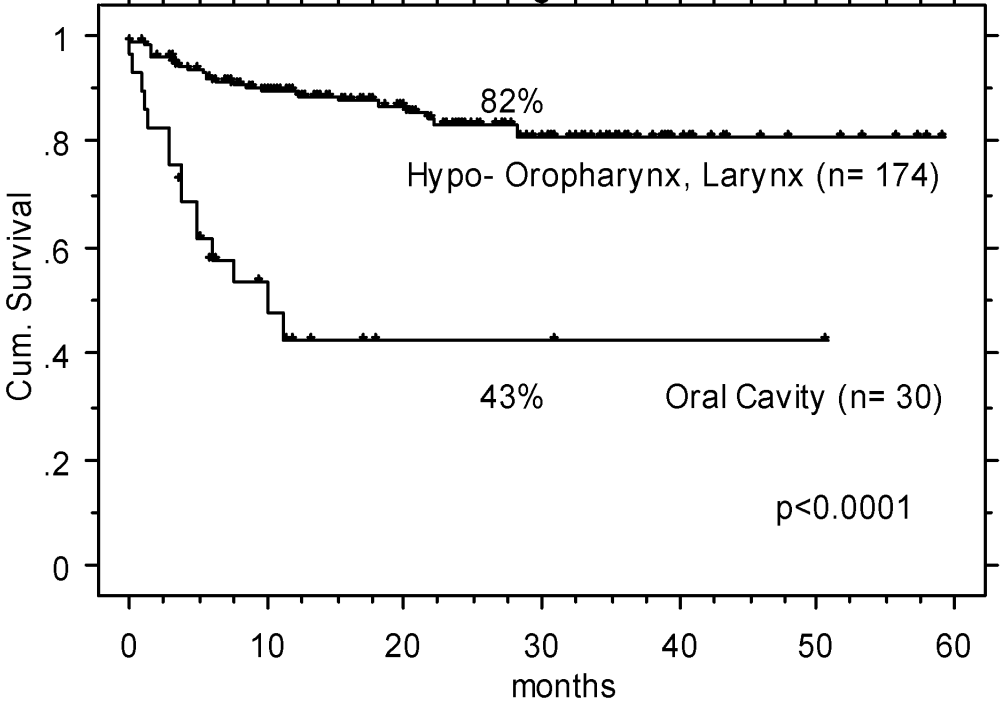

Supplement: MOESM4 [file 9632832]
